# Supplementary material
Source: PubMed Central journal article supplement (PMC7363505)
Supplement: NIHMS1547607-supplement-1.pdf [file NIHMS1547607-supplement-1.pdf]

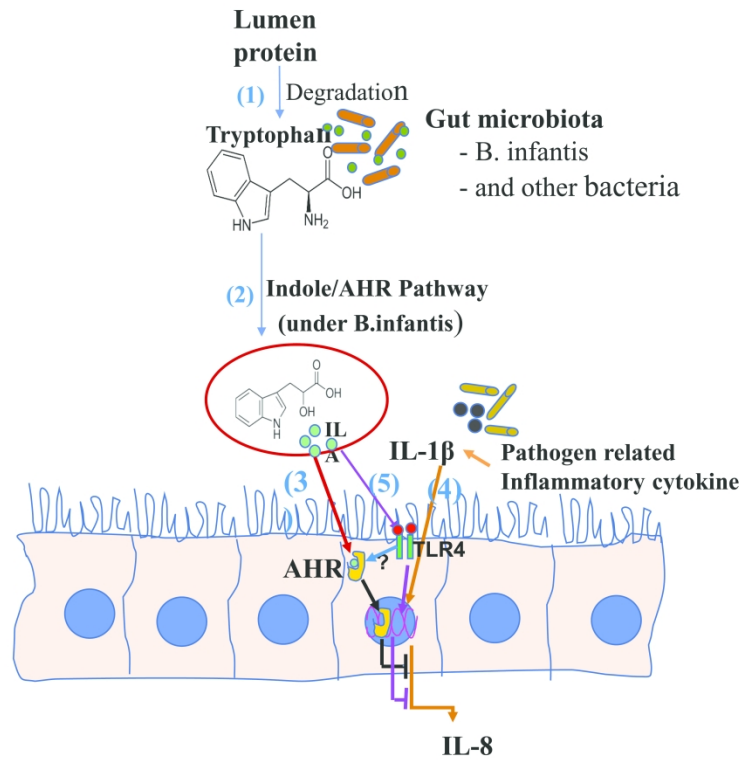

**Supplemental Figure S1: Cartoon of the suggested mechanism of the anti-inflammatory effect of ILA in *B. infantis* secretions on an intestinal epithelial cell**  
**(1)** Degradation of lumen protein leads to the release of tryptophan (**Trp**). Under the influence of the gut microbiota, Trp is converted to **(2)** indole-3-lactic acid (**ILA**) by the indole/AHR pathways. ILA acts on the aryl hydrocarbon receptor (**AHR**) found in fetal enterocytes **(3)** thereby affecting the innate immune response in a ligand-specific fashion suppressing a pathogen-mediated inflammatory cytokine IL-1 $\beta$ -induced IL-8 secretion **(4)**. TLR4 is required for ILA anti-inflammation in immature enterocyte with the unknown mechanism **(5)**.

**AHR:** aryl hydrocarbon receptor  
**ILA:** indole-3-lactic acid

127x164mm (1000 x 1000 DPI)

| <b>Ingredients</b> | <b>Amount</b>                           | <b>Final ConCen</b> |
|--------------------|-----------------------------------------|---------------------|
| OptiMem media      | 1000 ml                                 |                     |
| Sodium Acetate     | 5g                                      | 5g/L= 60 mM         |
| L-Cysteine         | 0.5g                                    | 0.5g/L              |
| Album              | 1g                                      | 1g/L                |
| Yest extract       | 5g                                      | 5g/L                |
| Sodium Selenite    | 60µl of 1mM                             | 60 nM               |
| Vitamine A         | 5µl of 5µg/µl stock                     | 25 µg/L             |
| Holo transferin    | 60 µl of 5mg/ml stock                   | (0.3 µg/ml)         |
| Inulin             | 100mg                                   | 0.1mg/ml            |
| BPE                | 200ul of<br>25mg/ml stock               | 5 µg/ml             |
| MEMNEAA            | 10 ml                                   | 1x                  |
| Glutamite          | 10 ml                                   | 2 mM                |
| Hepes              | 10 ml                                   | 10 mM               |
| BHI                | 8 ml of 0.5g/ml Stock<br>(autocleaved ) | 4g/L                |

**Supplemental Table S1. *B. Infantis* culture media.** The table shows the ingredients of the *B.infantis* culture media, which is a modification of the combination of the intestinal epithelial cell culture media and the *B.infantis* culture media. **Abbreviation:** MEMNEAA- MEM non-essential amino acids, BPE- Bovine pituitary extract, BHI- Brain and heart infusion broth.
